# Supplementary material for: Synthesis of Magnetic Short-Channel Mesoporous Silica SBA-15 Modified with a Polypyrrole/Polyaniline Copolymer for the Removal of Mercury Ions from Aqueous Solution
Source: PubMed Central journal article supplement — ACS Omega. 2021 Sep 23;6(39):25791–806. doi: 10.1021/acsomega.1c04249 (PMC8495851; doi:10.1021/acsomega.1c04249), 2021-09-23
Supplement: ao1c04249_si_001.pdf [file ao1c04249_si_001.pdf]

## Supporting Information

# Synthesis of magnetic short-channel mesoporous silica SBA-15 modified with polypyrrole/polyaniline copolymer for the removal of mercury ions from aqueous solution

Jingtao Shen<sup>a,†</sup>, Shuyuan Zhang<sup>a,†</sup>, Zheng Zeng<sup>a</sup>, Jialun Huang<sup>a</sup>, Yi Shen<sup>a</sup>,  
Yongfu Guo<sup>a,b,\*</sup>

<sup>a</sup> School of Environmental Science and Engineering, Suzhou University of Science and Technology, Suzhou, 215009, China

<sup>b</sup> Jiangsu Collaborative Innovation Center of Technology and Material of Water Treatment, Suzhou University of Science and Technology, Suzhou, 215009, China

---

\*Corresponding author: Tel: +86 512 68092987 (Y. Guo).

E-mail address: yongfuguo@163.com (Y. Guo)

† These authors contributed equally to this work.

**Figure S1**

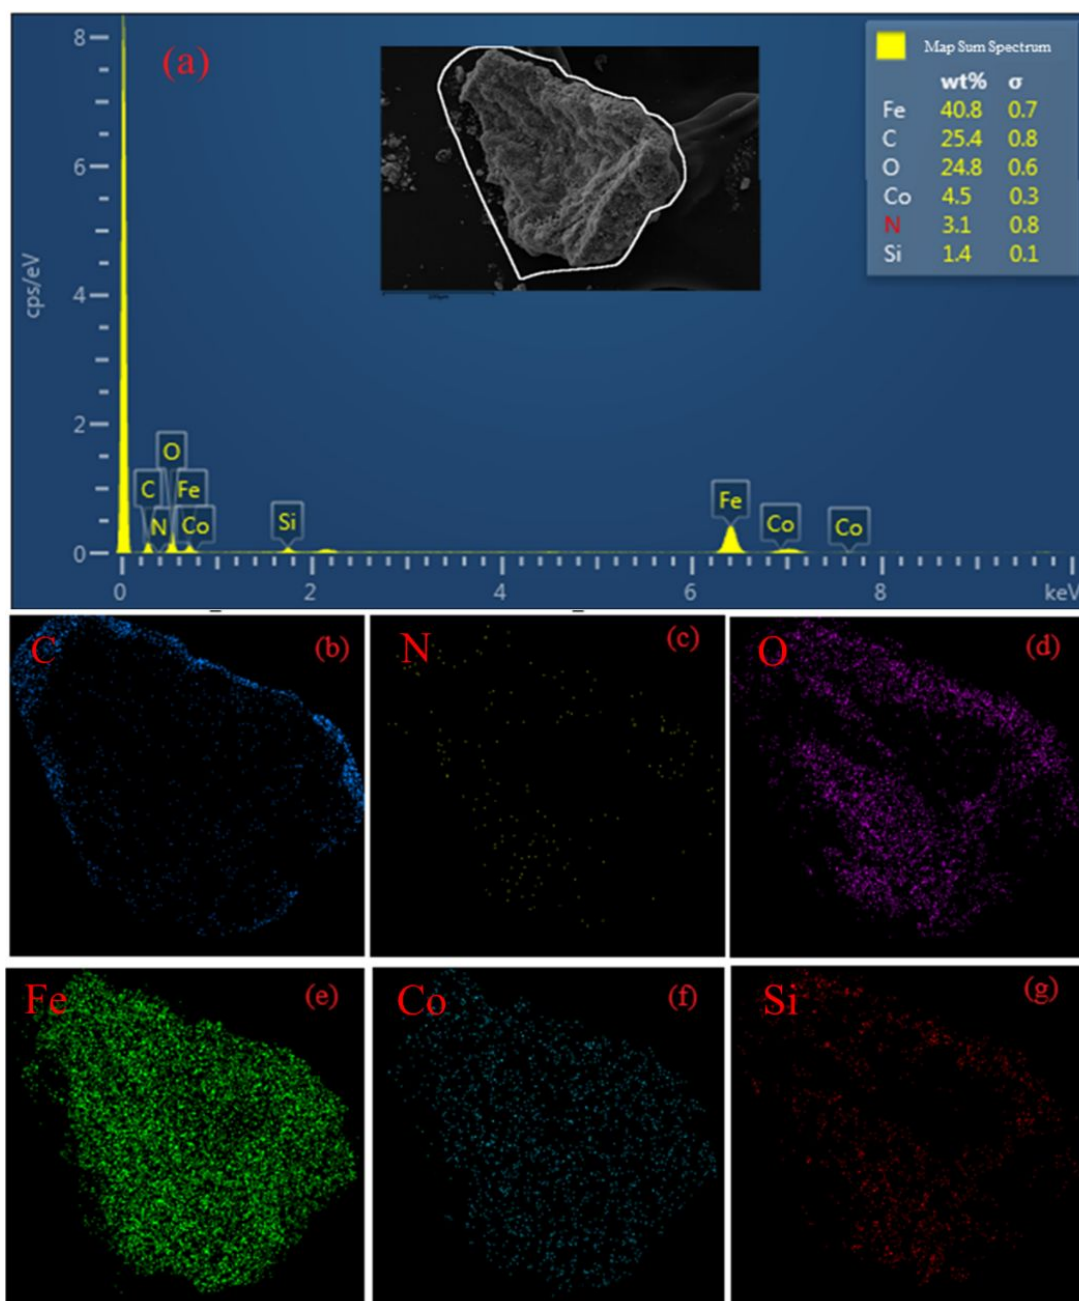

**Figure S1.** EDS spectrum (inserted: Map Sum Spectrum) of PPy-PANI/M-SBA-15

(a), and EDX elemental mapping of PPy-PANI/M-SBA-15 (b-g).

**Table S1.**

Kinetic fitting for adsorption of Hg( II ) onto PPy-PANI/M-SBA-15.

| <b>Pseudo-first-order</b>       |             |         |           |        |         |           |        |         |
|---------------------------------|-------------|---------|-----------|--------|---------|-----------|--------|---------|
| $q_{e,exp}$                     | $q_{e,fit}$ | $k_1$   | $R^2$     | $x^2$  | SSE     | RMSE      |        |         |
| 253.8                           | 231.6       | 0.1159  | 0.8580    | 0.8491 | 11608   | 26.9      |        |         |
| <b>Pseudo-second-order</b>      |             |         |           |        |         |           |        |         |
| $q_{e,exp}$                     | $q_{e,fit}$ | $k_1$   | $R^2$     | $x^2$  | SSE     | RMSE      |        |         |
| 253.8                           | 241.5       | 0.0008  | 0.9309    | 0.9266 | 5650.3  | 18.8      |        |         |
| <b>Intra-particle diffusion</b> |             |         |           |        |         |           |        |         |
| $K_{d-1}$                       | $C_1$       | $R_1^2$ | $K_{d-2}$ | $C_2$  | $R_2^2$ | $K_{d-3}$ | $C_3$  | $R_3^2$ |
| 33.68                           | 37.36       | 0.906   | 4.95      | 167.29 | 0.967   | 0.20      | 255.74 | 1       |
| <b>Elovich</b>                  |             |         |           |        |         |           |        |         |
| $\alpha$                        | $\beta$     | $R^2$   | $x^2$     | SSE    | RMSE    |           |        |         |
| 276.6                           | 0.03236     | 0.9924  | 0.9913    | 625.1  | 6.445   |           |        |         |

**Table S2.**

Adsorption isotherm parameters of PPy-PANI/ M-SBA-15.

| <b>Langmuir</b>             |                                              |              |              |        |        |       |       |
|-----------------------------|----------------------------------------------|--------------|--------------|--------|--------|-------|-------|
| $T$ (K)                     | $Q_m$ (mg/g)                                 | $R_L$        | $K_L$ (L/mg) | $R^2$  | $x^2$  | SSE   | RMSE  |
| 298                         | 363.9                                        | 0.256        | 0.0967       | 0.9697 | 0.9568 | 672.4 | 14.97 |
| 308                         | 355.8                                        | 0.153        | 0.1839       | 0.9838 | 0.9784 | 338.7 | 10.63 |
| 318                         | 366.1                                        | 0.025        | 1.3095       | 0.9898 | 0.9864 | 239.1 | 8.93  |
| <b>Freundlich</b>           |                                              |              |              |        |        |       |       |
| $T$ (K)                     | $K_F$ (L <sup>n</sup> /mg <sup>n-1</sup> /g) | $1/n_F$      | $R^2$        | $x^2$  | SSE    | RMSE  |       |
| 298                         | 67.5                                         | 0.4082       | 0.9173       | 0.8897 | 1171.6 | 23.92 |       |
| 308                         | 101.4                                        | 0.3256       | 0.9794       | 0.9725 | 430.9  | 11.99 |       |
| 318                         | 214.6                                        | 0.1646       | 0.9334       | 0.9113 | 1560   | 22.8  |       |
| <b>Temkin</b>               |                                              |              |              |        |        |       |       |
| $T$ (K)                     | $b_T$                                        | $k_T$        | $R^2$        | $x^2$  | SSE    | RMSE  |       |
| 298                         | 84.6                                         | 0.820        | 0.9574       | 0.9431 | 885.1  | 17.18 |       |
| 308                         | 73.45                                        | 2.096        | 0.9922       | 0.9896 | 162.4  | 7.36  |       |
| 318                         | 48.35                                        | 75.163       | 0.9695       | 0.9593 | 715.6  | 15.44 |       |
| <b>Dubinin-Radushkevich</b> |                                              |              |              |        |        |       |       |
| $T$ (K)                     | $q_{max}$ (mg/g)                             | $E$ (KJ/mol) | $R^2$        | $x^2$  | SSE    | RMSE  |       |
| 298                         | 38.78                                        | 121.09       | 0.9193       | 0.8925 | 52.9   | 3.252 |       |
| 308                         | 35.75                                        | 134.07       | 0.9280       | 0.9040 | 46.7   | 3.055 |       |
| 318                         | 37.55                                        | 166.71       | 0.9603       | 0.9471 | 33.6   | 2.592 |       |

**Table S3.**

Comparison of adsorption capacity for mercury (II) ions.

| Adsorbents                                                          | BET (m <sup>2</sup> /g) | pH   | Fitting model | Q <sub>m</sub> (mg/g) | Ref.      |
|---------------------------------------------------------------------|-------------------------|------|---------------|-----------------------|-----------|
| CoFe <sub>2</sub> O <sub>4</sub> @SiO <sub>2</sub> -NH <sub>2</sub> | 17.08                   | 7    | Langmuir      | 149.3                 | 1         |
| CoFe <sub>2</sub> O <sub>4</sub> -rGO                               | 69.9                    | 4.6  | Langmuir      | 157.9                 | 2         |
| SBA-15-SH                                                           | 50.9                    | 8    | Freundlich    | 195.6                 | 3         |
| Coal-based activated carbon                                         | 900                     | 4    | Langmuir      | 48.0                  | 4         |
| Polypyrrole/SBA-15                                                  | 97.6                    | 8    | Langmuir      | 200                   | 5         |
| PDA@Fe <sub>3</sub> O <sub>4</sub>                                  | /                       | 5.36 | Langmuir      | 307                   | 6         |
| Polypyrrole multilayer cellulose                                    | /                       | 6    | Langmuir      | 31.68                 | 7         |
| Magnetic GO                                                         | 58.6                    | 6    | Langmuir      | 71.3                  | 8         |
| Magnetic CNTs/Fe <sub>3</sub> O <sub>4</sub>                        | 97.16                   | 6.5  | Langmuir      | 65.52                 | 9         |
| PPy-PANI/M-SBA-15                                                   | 12.3                    | 7    | Langmuir      | 253.8                 | This work |

## Regeneration performance

In the experimental part of studying the adsorption effect of pH on the material, it can be seen that the change of pH has a significant impact on the adsorption of PPy-PANI/M-SBA-15. Therefore, an acidic solution can be selected to clean the material to achieve material regeneration.

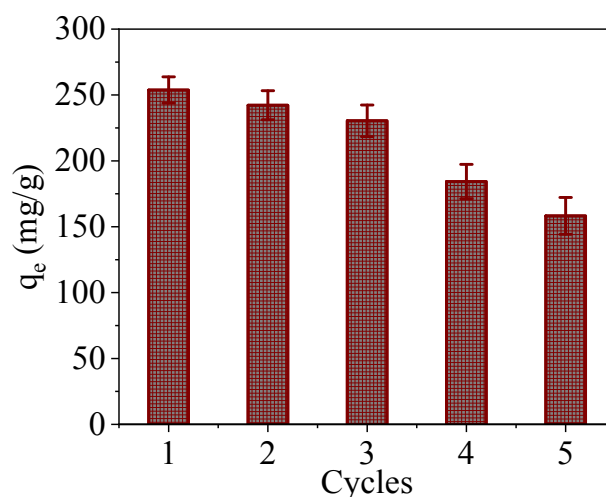

**Figure S2.** Adsorption performance after repeated use of PPy-PANI/M-SBA-15. (pH = 7, dosage of PPy-PANI/M-SBA-15 = 0.05 g/L, T = 298 K,  $C_0 = 30$  mg/L,  $t = 6$  h)

In this experiment, 0.1 M dilute HCl solution was used as the regeneration solution. The PPy-PANI/M-SBA-15 after adsorption equilibrium was placed in the regeneration solution and oscillated at room temperature for 2 h. After that, a magnet was used to separate the adsorbent from the regeneration solution, then the material was washed with pure water and dried. To show the reusability of the adsorbent, the same method was used for five cycles. The results in [Figure S2](#) show that the adsorption and regeneration performance of PPy-PANI/M-SBA-15 remain good in the first three processes, only a decrease of 9.2%. However, there was a significant decrease after the fourth regeneration, which may be caused by the blockage of some pores of the material or the loss of some active adsorption sites on the surface of the material during multiple adsorption/desorption processes. In short, PPy-PANI/M-SBA-15 has good regeneration performance.

**Table S4.**

Thermodynamic parameters of adsorption of mercury by PPy-PANI/M-SBA-15.

| $C_0$ | $\Delta H^0$ | $\Delta S^0$ | $\Delta G^0$ |        |        |
|-------|--------------|--------------|--------------|--------|--------|
|       |              |              | 298 K        | 308 K  | 318 K  |
| 20    | 45.17        | 218.16       | -20.01       | -21.61 | -24.40 |
| 30    | 20.64        | 134.81       | -19.64       | -20.64 | -22.36 |
| 40    | 16.37        | 117.53       | -18.72       | -19.68 | -21.08 |

## REFERENCES

- (1) Wang, X.; Zhang, Z.; Zhao, Y.; Xia, K.; Guo, Y.; Qu, Z.; Bai, R., A mild and facile synthesis of amino functionalized  $\text{CoFe}_2\text{O}_4@\text{SiO}_2$  for Hg(II) removal. *Nanomaterials* **2018**, *8* (9), 673.
- (2) Zhang, Y.; Yan, L.; Xu, W.; Guo, X.; Cui, L.; Gao, L.; Wei, Q.; Du, B., Adsorption of Pb(II) and Hg(II) from aqueous solution using magnetic  $\text{CoFe}_2\text{O}_4$ -reduced graphene oxide. *J. Mol. Liq.* **2014**, *191*, 177-182.
- (3) Shen, Y.; Jiang, N.; Liu, S.; Zheng, C.; Wang, X.; Huang, T.; Guo, Y.; Bai, R., Thiol functionalization of short channel SBA-15 through a safe, mild and facile method and application for the removal of mercury (II). *J. Environ. Chem. Eng* **2018**, *6* (4), 5420-5433.
- (4) Guo, Y.; Wang, Z.; Zhou, X.; Bai, R., Removal of mercury (II) from aqueous solution with three commercial raw activated carbons. *Res. Chem. Intermed.* **2016**, *43* (4), 2273-2297.
- (5) Shafiabadi, M.; Dashti, A.; Tayebi, H.-A., Removal of Hg (II) from aqueous solution using polypyrrole/SBA-15 nanocomposite: Experimental and modeling. *Synth. Met.* **2016**, *212*, 154-160.
- (6) Davodi, B.; Ghorbani, M.; Jahangiri, M., Adsorption of mercury from aqueous solution on synthetic polydopamine nanocomposite based on magnetic nanoparticles using box-behnken design. *J. Taiwan Inst. Chem. Eng.* **2017**, *80*, 673.

- (7) Hanif, Z.; Lee, S.; Hussain Qasim, G.; Ardiningsih, I.; Kim, J.-A.; Seon, J.; Han, S.; Hong, S.; Yoon, M.-H., Polypyrrole multilayer-laminated cellulose for large-scale repeatable mercury ion removal. *J. Mater. Chem. A*. **2016**, *4* (32), 12425-12433.
- (8) Guo, Y.; Deng, J.; Zhu, J.; Zhou, X.; Bai, R., Removal of mercury(ii) and methylene blue from a wastewater environment with magnetic graphene oxide: adsorption kinetics, isotherms and mechanism. *RSC Adv.* **2016**, *6* (86), 82523-82536.
- (9) Zhang, C.; Sui, J.; Li, J.; Tang, Y.; Cai, W., Efficient removal of heavy metal ions by thiol-functionalized superparamagnetic carbon nanotubes. *Chem. Eng. J.* **2012**, *210*, 45-52.
